# Supplementary material for: Effect of cannabis use history on postoperative opioid utilization in lumbar fusion patients: an American retrospective study
Source: PubMed Central journal article supplement — Asian Spine J. 2024 Oct 22;18(5):639–46. doi: 10.31616/asj.2024.0194 (PMC11538822; doi:10.31616/asj.2024.0194), 2024-10-22
Supplement: asj-2024-0194-Supplementary-2.pdf [file asj-2024-0194-Supplementary-2.pdf]

**Supplement 2.** Logistic regression model assessing factor-association with odds of high opioid utilization at 6 months following surgery

| Characteristic                          | Binomial logistic regression OR (95% CI) |
|-----------------------------------------|------------------------------------------|
| <b>Age (yr)</b>                         |                                          |
| 15–19                                   | 0.209 (0.012–1.022)                      |
| 25–29                                   | 1.232 (0.77–2.045)                       |
| 30–34                                   | 1.156 (0.751–1.863)                      |
| 35–39                                   | 1.172 (0.769–1.871)                      |
| 40–44                                   | 1.011 (0.667–1.609)                      |
| 45–49                                   | 1.058 (0.7–1.678)                        |
| 50–54                                   | 1.025 (0.68–1.622)                       |
| 55–59                                   | 0.898 (0.596–1.421)                      |
| 60–64                                   | 0.757 (0.502–1.2)                        |
| 65–69                                   | 0.517 (0.342–0.822)                      |
| 70–74                                   | 0.352 (0.231–0.562)                      |
| 75–79                                   | 0.205 (0.131–0.333)                      |
| 80–85                                   | 0.166 (0.061–0.389)                      |
| Gender (female)                         | 0.807 (0.759–0.857)                      |
| <b>Year of surgery</b>                  |                                          |
| 2012                                    | 0.202 (0.021–4.953)                      |
| 2013                                    | 0.209 (0.022–5.12)                       |
| 2014                                    | 0.183 (0.019–4.476)                      |
| 2015                                    | 0.187 (0.02–4.577)                       |
| 2016                                    | 0.149 (0.016–3.646)                      |
| 2017                                    | 0.1 (0.011–2.456)                        |
| 2018                                    | 0.071 (0.007–1.736)                      |
| 2019                                    | 0.058 (0.006–1.421)                      |
| 2020                                    | 0.05 (0.005–1.225)                       |
| 2021                                    | 0 (0–0)                                  |
| <b>Surgical levels</b>                  |                                          |
| Two                                     | 1.389 (1.274–1.512)                      |
| Three                                   | 1.557 (1.447–1.674)                      |
| <b>Comorbidities</b>                    |                                          |
| Depression                              | 1.23 (1.136–1.33)                        |
| Anxiety                                 | 1.219 (1.12–1.324)                       |
| Social determinants of health disparity | 0.996 (0.887–1.116)                      |
| <b>Insurance type</b>                   |                                          |
| Commercial                              | 2.649 (0.581–46.919)                     |
| Government                              | 2.588 (0.559–46.049)                     |
| Medicaid                                | 3.335 (0.728–59.166)                     |
| Medicare                                | 4.025 (0.882–71.315)                     |
| Unknown                                 | 3.835 (0.814–68.554)                     |
| <b>Opioid use history</b>               |                                          |
| ≤34 MME                                 | 2.917 (2.344–3.592)                      |

(Continued on next column)

**Supplement 2.** Continued

| Characteristic | Binomial logistic regression OR (95% CI) |
|----------------|------------------------------------------|
| 35–74 MME      | 6.378 (4.484–8.829)                      |
| 75–89 MME      | 5.829 (1.737–14.639)                     |
| 90–100 MME     | 5.416 (1.868–12.471)                     |
| ≥100 MME       | 21.962 (9.485–46.603)                    |
| Unknown        | 4.04 (3.781–4.319)                       |

OR, odds ratio; CI, confidence interval; MME, morphine milliequivalents.
